# Supplementary material for: Impact of COVID-19 on the Sense of Job Security Among Community Pediatric Hospitalists
Source: Oxford University Press journal article supplement (doi:10.1542/hpeds.2022-006898), 2023-04-03
Supplement: hpeds.2022-006898supplementarydata1.pdf [file hpeds.2022-006898supplementarydata1.pdf]

## Supplemental Information

**SUPPLEMENTAL TABLE 5** Other Change in Pay

| Response                                                                                                                                       | Category      |
|------------------------------------------------------------------------------------------------------------------------------------------------|---------------|
| Had to find a new job and pay and hours severely reduced.                                                                                      | Reduced pay   |
| Initially reduced, now back to normal but also had freeze in annual salary increase (which will then fail to compound over life of my career). | Reduced pay   |
| Not pay change but allow more flexibility if require time off for COVID-related.                                                               | Unchanged pay |
| Position terminated.                                                                                                                           | Reduced pay   |
| Received normal merit increase but did not receive any further raise.                                                                          | Unchanged pay |
| Salary the same, but employer did not match 401k, which is essentially a pay cut.                                                              | Reduced pay   |
| Unchanged so far, though discussions for change in 2021, unfortunately, because of decreased RVUs.                                             | Unchanged pay |
| Unchanged, but no yearly raise                                                                                                                 | Reduced pay   |
| RVU, relative value units.                                                                                                                     |               |
