# Supplementary material for: Impact of COVID-19 on the Sense of Job Security Among Community Pediatric Hospitalists
Source: Oxford University Press journal article supplement (doi:10.1542/hpeds.2022-006898), 2023-04-03
Supplement: hpeds.2022-006898supplementarydata2.pdf [file hpeds.2022-006898supplementarydata2.pdf]

## Appendix A – Questionnaire and Codebook

This appendix provides the text of the questionnaire. The study was programmed into Qualtrics, an online survey software. **Text in blue did not appear on the respondent screens.** Rather, these are items included here to make this document usable as a codebook.

- (1) Numbers in blue in parentheses at the end of response choices are the codes that apply to those answers. Throughout the dataset, we have the following standardized negative values for reserved codes:

- 1 **Refused** (when comments in text fields make it explicit R is refusing to answer or “prefer not to answer” is a choice)
- 2 **Don’t Know** (when indicated by textual response or if “Don’t Know” or “Unsure” are choices)
- 3 **Missing** (answer field was left blank – reason unknown)
- 4 or -5 **Not Applicable** (these are programmed or logical skips)

Negative codes allow for use of the same values for reserved codes across variables. These can then be handled as a group with use of the command `< 0`, or separated out when separate analysis is wanted.

**Q2** Bolded variable names for force choice questions appear above the question.

**(Q1)** For select-all-that apply items or questions in tables, the stem question or header is not a variable, but informs the meaning of the responses. A question number in parentheses simply means there is no variable corresponding to this number, although this was a question in the survey. Each response option has its own variable name, noted on the line of the option in question. These item by item variable names are formatted as below with the overall question number, then an underscore, then the position of the item in the table or check-all-that-apply list.

**Q1\_1** Select-all-that-apply or table items have variable names that begin with the question text number and are followed by an underscore and then the number of the item in the list.  
**Q1\_2**

**[ ]** Skip and display logic is shown within brackets in all caps.

▼ This down-arrow mark indicates a drop-down response format. The range of choices in the drop down is shown in parentheses.

## LANDING PAGE

**Thank you for your willingness to help University of Chicago researchers understand Pediatricians' career motivations and the effect of COVID-19 on these motivators. This voluntary and confidential survey takes about 10 minutes. Do you wish to ...**

- Learn more about the study (1) [\[GO TO PROJECT INFO SHEET PAGE\]](#)
- Go directly to the survey (2) [\[GO TO SECTION 1\]](#)

----- Page Break -----

## Career Motivators for Community Pediatric Hospitalists and Effects of COVID-19

### What is this research about?

This study aims to learn what the career motivators are for pediatric hospitalists in the community and the effects of COVID-19 on those motivators. The long-term goal is to collect information that will improve recruitment and career support for community pediatric hospitalists.

### Who is conducting this study?

Dr. Rachel Marek, a board-certified pediatrician affiliated with Texas Children's Hospital, Dr. H. Barrett Fromme, board-certified pediatrician and professor of pediatrics at the University of Chicago, and Dr. Kelsey Jackson, a board-certified pediatrician in Minnesota, affiliated with St. Cloud Hospital, are co-investigators for this study. They have contracted with the University of Chicago Survey Lab to collect the data using Qualtrics, an online survey platform.

### What does participation consist of?

We ask that you complete a one-time, 10-minute, confidential web survey. If you leave the survey before finishing, you may pick up where you left off by using the same link you were sent. Questions cover:

- early pediatric hospital medicine experiences
- future career plans
- COVID-19 impact on your employment
- basic demographic information

Participation is completely voluntary; you may skip any question you do not wish to answer and may leave the survey at any time. There are no risks or payments associated with taking part; neither taking part nor not taking part have any consequences for you. We hope you will be willing to take a few minutes to help us.

### Who will know what you say?

This survey is confidential. The University of Chicago Survey Lab is fielding the survey in Qualtrics. The Survey Lab will separate your email address from the survey answers prior to providing results to the researchers; researchers will never see your responses connected to your identity. Your contact information will be used only to solicit participation and deleted once the survey is closed. Although all online data collection includes some chance of security breach, the questions we ask carry no foreseeable risk, and you may skip any question you do not wish to answer. We minimize the risk of data breach by use of firewall and password-protected computers.

### What if you have further questions or comments?

- If you have **substantive questions about the study**, please contact the investigators at:

Kelsey Reno, MD [kreno03@gmail.com](mailto:kreno03@gmail.com)

H. Barrett Fromme, MD [hfromme@peds.bsd.uchicago.edu](mailto:hfromme@peds.bsd.uchicago.edu)

Rachel Marek, MD [rlmarek@texaschildrens.org](mailto:rlmarek@texaschildrens.org)

- If you have **problems accessing or using the survey**, please contact University of Chicago Survey Lab Co-Director Martha Van Haitsma at [mvh@uchicago.edu](mailto:mvh@uchicago.edu)
- This study has been **determined to be IRB-exempt** by the Biological Sciences Division (BSD) Institutional Review Board (IRB) at the University of Chicago. If you have concerns about this determination or **your rights as a research participant**, please contact the BSD IRB at [bsdirm@bsd.uchicago.edu](mailto:bsdirm@bsd.uchicago.edu) or 773-702-6505.

### Do you wish to ...

- ☐ Take the survey (1)
- ☐ Opt out of the study (0)

----- Page Break -----

## Page 1 of 16: Early Pediatric Hospital Medicine (PHM) Experiences

### Q1

**At the time you took your first attending position in Community Pediatric Hospital Medicine (cPHM), was your goal to work in a community hospital?**

- ☐ Yes, wanted to work in a community hospital (1)
- ☐ No (0)

### Q2 [DISPLAY IF Q1 ANSWERED NO]

**At the time you took your first community PHM (cPHM) position, what job setting would you have preferred?**

- ☐ University-based or free-standing children's hospital (1)
- ☐ Primary Care, Ambulatory clinic, or EM (2)
- ☐ PHM Fellowship (3)
- ☐ Other pediatric fellowship (4)
- ☐ Other (5) **Q2\_TEXT** please describe \_\_\_\_\_

----- Page Break -----

## Page 2 of 16

### (Q3)

**How important were the following *work scope opportunities* in getting you to accept your first community pediatric hospital medicine (cPHM) job?**

|                                                                                                     | Not<br>important<br>(1) | Somewhat<br>important<br>(2) | Very<br>important<br>(3) |
|-----------------------------------------------------------------------------------------------------|-------------------------|------------------------------|--------------------------|
| <b>Q3_1</b> Opportunity to teach medical students and residents                                     | <input type="radio"/>   | <input type="radio"/>        | <input type="radio"/>    |
| <b>Q3_2</b> Opportunity to conduct basic science, clinical, or medical education research           | <input type="radio"/>   | <input type="radio"/>        | <input type="radio"/>    |
| <b>Q3_3</b> Opportunity to perform procedures                                                       | <input type="radio"/>   | <input type="radio"/>        | <input type="radio"/>    |
| <b>Q3_4</b> Work in a variety of inpatient settings (inpatient floors, mother baby, sedation, etc.) | <input type="radio"/>   | <input type="radio"/>        | <input type="radio"/>    |
| <b>Q3_5</b> High acuity of illness                                                                  | <input type="radio"/>   | <input type="radio"/>        | <input type="radio"/>    |
| <b>Q3_6</b> High complexity of illness                                                              | <input type="radio"/>   | <input type="radio"/>        | <input type="radio"/>    |
| <b>Q3_7</b> Patient volume                                                                          | <input type="radio"/>   | <input type="radio"/>        | <input type="radio"/>    |

**Q4 [DISPLAY IF Q3\_7, PATIENT VOLUME, IS CODED VERY OR SOMEWHAT IMPORTANT]**

**When I accepted my first job in cPHM, I preferred...**

- ☐ A high average daily census (1)
- ☐ A moderate average daily census (2)
- ☐ A low average daily census (3)

----- Page Break -----

Page 3 of 16

**(Q5)**

**How important were the following *leadership and advocacy opportunities* in getting you to accept your first community pediatric hospital medicine (cPHM) job?**

|                                                                                                                                         | Not<br>Important<br>(1) | Somewhat<br>important<br>(2) | Very<br>important<br>(3) |
|-----------------------------------------------------------------------------------------------------------------------------------------|-------------------------|------------------------------|--------------------------|
| <b>Q5_1</b> Faster opportunity to hold leadership position                                                                              | <input type="radio"/>   | <input type="radio"/>        | <input type="radio"/>    |
| <b>Q5_2</b> Patient advocacy opportunities on a local or larger scale<br>(government / policy work)                                     | <input type="radio"/>   | <input type="radio"/>        | <input type="radio"/>    |
| <b>Q5_3</b> Global health opportunities                                                                                                 | <input type="radio"/>   | <input type="radio"/>        | <input type="radio"/>    |
| <b>Q5_4</b> Opportunity to play an integral role in the implementation of<br>clinical system changes (e.g. protocols, QI enhancements). | <input type="radio"/>   | <input type="radio"/>        | <input type="radio"/>    |

----- Page Break -----

Page 4 of 16

**(Q6)**

**How important were the following *pay and benefit considerations* in getting you to accept your first community pediatric hospital medicine (cPHM) job?**

|                                                                                                                                   | Not<br>Important<br>(1) | Somewhat<br>important<br>(2) | Very<br>important<br>(3) |
|-----------------------------------------------------------------------------------------------------------------------------------|-------------------------|------------------------------|--------------------------|
| <b>Q6_1</b> Paid time for non-clinical work (e.g., administrative tasks,<br>research, or education)                               | <input type="radio"/>   | <input type="radio"/>        | <input type="radio"/>    |
| <b>Q6_1</b> Salary                                                                                                                | <input type="radio"/>   | <input type="radio"/>        | <input type="radio"/>    |
| <b>Q6_3</b> Benefits package including health insurance, life insurance,<br>disability insurance, retirement plans, and CME money | <input type="radio"/>   | <input type="radio"/>        | <input type="radio"/>    |

----- Page Break -----

**(Q7)**

How important were the following *lifestyle and working conditions* in getting you to accept your first community pediatric hospital medicine (cPHM) job?

|                                                                                                           | Not<br>Important<br>(1) | Somewhat<br>important<br>(2) | Very<br>important<br>(3) |
|-----------------------------------------------------------------------------------------------------------|-------------------------|------------------------------|--------------------------|
| <b>Q7_1</b> Autonomy in caring for sub-specialty patients                                                 | <input type="radio"/>   | <input type="radio"/>        | <input type="radio"/>    |
| <b>Q7_2</b> Support from sub-specialists                                                                  | <input type="radio"/>   | <input type="radio"/>        | <input type="radio"/>    |
| <b>Q7_3</b> Flexible hours                                                                                | <input type="radio"/>   | <input type="radio"/>        | <input type="radio"/>    |
| <b>Q7_4</b> Generally enhanced work / life integration                                                    | <input type="radio"/>   | <input type="radio"/>        | <input type="radio"/>    |
| <b>Q7_5</b> Geographic location (commute, cost of living, nearness to relatives, weather & terrain, etc.) | <input type="radio"/>   | <input type="radio"/>        | <input type="radio"/>    |
| <b>Q7_6</b> Sense of belonging to the local community and / or the hospital community                     | <input type="radio"/>   | <input type="radio"/>        | <input type="radio"/>    |
| <b>Q7_7</b> Feeling valued as a member of the local community and / or the hospital community             | <input type="radio"/>   | <input type="radio"/>        | <input type="radio"/>    |

**Q8\_TEXT**

If there were other factors that were very important to your decision to accept your first job in cPHM, please describe those here: \_\_\_\_\_

----- Page Break -----

(Q9) DISPLAY IF MORE THAN 2 FACTORS RATED VERY IMPORTANT ACROSS Q3, Q5, Q6, Q7, ONLY DISPLAYING THOSE ITEMS RATED AS VERY IMPORTANT]

**Of all the factors very important to your decision to accept your first community pediatric hospital medicine job, which one or two were most important?**

- ☐ Q9\_1 Opportunity to teach medical students and residents
- ☐ Q9\_2 Opportunity to conduct basic science, clinical, or medical education research
- ☐ Q9\_3 Opportunity to perform procedures
- ☐ Q9\_4 Work in a variety of inpatient settings (inpatient floors, mother baby, sedation, etc.)
- ☐ Q9\_5 High acuity of illness
- ☐ Q9\_6 High complexity of illness
- ☐ Patient volume USING RESPONSE TO THIS ITEM AND Q4, THE FOLLOWING THREE ITEMS WERE COMPUTED AND ADDED TO THE LIST OF FINAL VARIABLES IN LIEU OF THIS SINGLE ITEM
- ☐ Q9\_7 High average daily census
- ☐ Q9\_8 Moderate average daily census
- ☐ Q9\_9 Low average daily census
- ☐ Q9\_10 Faster opportunity to hold leadership position
- ☐ Q9\_11 Patient advocacy opportunities on a local or larger scale (government / policy work)
- ☐ Q9\_12 Global health opportunities
- ☐ Q9\_13 Opportunity to play an integral role in the implementation of clinical system changes (e.g. protocols, QI enhancements).
- ☐ Q9\_14 Paid time for non-clinical work (e.g., administrative tasks, research, or education)
- ☐ Q9\_15 Salary
- ☐ Q9\_16 Benefits package including health insurance, life insurance, disability insurance, retirement plans, and CME money
- ☐ Q9\_17 Autonomy in caring for sub-specialty patients
- ☐ Q9\_18 Support from sub-specialists
- ☐ Q9\_19 Flexible hours
- ☐ Q9\_20 Generally enhanced work / life integration
- ☐ Q9\_21 Geographic location (commute, cost of living, nearness to relatives, weather & terrain, etc.)
- ☐ Q9\_22 Sense of belonging to the local community and / or the hospital community
- ☐ Q9\_23 Feeling valued as a member of the local community and / or the hospital community
- ☐ 9\_24 Other ADDED VARIABLE – IF OTHER SPECIFIED IN Q8 THIS IS MARKED 1 ALL OF THE ABOVE CODED (1) IF SELECTED; (0) IF NOT SELECTED

## Page 7 of 16 Future Career Plans

### Q10

During the next 5 years, ideally you would...

- ☐ Continue in Community Pediatric Hospital Medicine (cPHM) (1)
- ☐ Transition to a University-based or stand-alone children's hospital (2)
- ☐ Leave for a PHM fellowship (3)
- ☐ Leave to pursue a different area of pediatrics or a non-PHM fellowship (4)
- ☐ Retire (5)
- ☐ Other (6) Q10\_TEXT please describe \_\_\_\_\_

----- Page Break -----

## Page 8 of 16 Future Career Plans

“Page 8 of 16” header only appeared once to any given respondent, but depending on response to Q10, page 8 displayed was different for different respondents.

(Q11) [DISPLAY IF ANSWER CONTINUE IN CPHM to Q10]

How important are the following in motivating you to *remain in cPHM*?

|                                                                                                                                           | Not<br>important<br>(1) | Somewhat<br>important<br>(2) | Very<br>important<br>(3) |
|-------------------------------------------------------------------------------------------------------------------------------------------|-------------------------|------------------------------|--------------------------|
| Q11_1 Leadership and advocacy opportunities                                                                                               | <input type="radio"/>   | <input type="radio"/>        | <input type="radio"/>    |
| Q11_2 Mentoring and teaching opportunities                                                                                                | <input type="radio"/>   | <input type="radio"/>        | <input type="radio"/>    |
| Q11_3 Research opportunities (clinical, educational, QI, etc.                                                                             | <input type="radio"/>   | <input type="radio"/>        | <input type="radio"/>    |
| Q11_4 Scope of practice (inpatient setting variety, acuity and complexity of illness, procedures, patient volume, sub-specialist support) | <input type="radio"/>   | <input type="radio"/>        | <input type="radio"/>    |
| Q11_5 Life-style factors (flexible hours, work / life integration, geographic location)                                                   | <input type="radio"/>   | <input type="radio"/>        | <input type="radio"/>    |
| Q11_6 Sense of belonging and feeling valued                                                                                               | <input type="radio"/>   | <input type="radio"/>        | <input type="radio"/>    |
| Q11_7 Paid time for non-clinical activities, such as research or education                                                                | <input type="radio"/>   | <input type="radio"/>        | <input type="radio"/>    |
| Q11_8 Salary                                                                                                                              | <input type="radio"/>   | <input type="radio"/>        | <input type="radio"/>    |
| Q11_9 Benefits package                                                                                                                    | <input type="radio"/>   | <input type="radio"/>        | <input type="radio"/>    |
| Q11_10 Other,<br>Q11_TEXT please describe _____                                                                                           | <input type="radio"/>   | <input type="radio"/>        | <input type="radio"/>    |

----- Page Break -----

**(Q12) [DISPLAY IF ANSWER *TRANSITION* to Q10]**

**How important are the following in motivating you to *transition* to a university-based or stand-alone children's hospital?**

|                                                                                                                                                  | Not<br>important<br>(1) | Somewhat<br>important<br>(2) | Very<br>important<br>(3) |
|--------------------------------------------------------------------------------------------------------------------------------------------------|-------------------------|------------------------------|--------------------------|
| <b>Q12_1</b> Leadership and advocacy opportunities                                                                                               | <input type="radio"/>   | <input type="radio"/>        | <input type="radio"/>    |
| <b>Q12_2</b> Mentoring and teaching opportunities                                                                                                | <input type="radio"/>   | <input type="radio"/>        | <input type="radio"/>    |
| <b>Q12_3</b> Research opportunities (clinical, educational, QI, etc.)                                                                            | <input type="radio"/>   | <input type="radio"/>        | <input type="radio"/>    |
| <b>Q12_4</b> Scope of practice (inpatient setting variety, acuity and complexity of illness, procedures, patient volume, sub-specialist support) | <input type="radio"/>   | <input type="radio"/>        | <input type="radio"/>    |
| <b>Q12_5</b> Life-style factors (flexible hours, work / life integration, geographic location)                                                   | <input type="radio"/>   | <input type="radio"/>        | <input type="radio"/>    |
| <b>Q12_6</b> Sense of belonging and feeling valued                                                                                               | <input type="radio"/>   | <input type="radio"/>        | <input type="radio"/>    |
| <b>Q12_7</b> Paid time for non-clinical activities, such as research or education                                                                | <input type="radio"/>   | <input type="radio"/>        | <input type="radio"/>    |
| <b>Q12_8</b> Salary                                                                                                                              | <input type="radio"/>   | <input type="radio"/>        | <input type="radio"/>    |
| <b>Q12_9</b> Benefits package                                                                                                                    | <input type="radio"/>   | <input type="radio"/>        | <input type="radio"/>    |
| <b>Q12_10</b> Other, please describe<br><b>Q12_TEXT</b> _____                                                                                    | <input type="radio"/>   | <input type="radio"/>        | <input type="radio"/>    |

----- Page Break -----

**Q13 [DISPLAY IF ANSWER *TAKE A PHM FELLOWSHIP* to Q10]**

**What are your plans after completing a PHM fellowship?**

- ☐ Return to cPHM (1)
- ☐ PHM at a university-based or stand-alone children's hospital (2)
- ☐ Other (3), **Q13\_TEXT** please describe \_\_\_\_\_
- ☐ Unsure (-2)

**(Q14) [DISPLAY IF ANSWER *TAKE A PHM FELLOWSHIP* to Q10]**

**What do you hope to get out of a PHM fellowship? Choose all that apply.**

- ☐ **Q14\_1** Board certification
- ☐ **Q14\_2** Solidify knowledge of work up & management of hospitalized children
- ☐ **Q14\_3** Practice core skills: EKG interpretation, radiographic interpretation, LP, PALS, airway management, pain management, and procedural sedation
- ☐ **Q14\_4** Research and mentoring opportunities
- ☐ **Q14\_5** Enter to leadership opportunities
- ☐ **Q14\_6** Facilitate transition to university-based or stand-alone children's hospital
- ☐ **Q14\_7** Additional training / degrees
- ☐ **Q14\_8** Other, **Q14\_TEXT** please describe \_\_\_\_\_

ALL OF THE ABOVE CODED (1) IF SELECTED; (0) IF NOT SELECTED

----- Page Break -----

**(Q15) [DISPLAY IF SELECT BOARD CERTIFICATION IN Q14]**

**Is board certification ...**

|                                                                     | Yes                   | No                    |
|---------------------------------------------------------------------|-----------------------|-----------------------|
|                                                                     | (1)                   | (0)                   |
| <b>Q15_1</b> Required for your current job?                         | <input type="radio"/> | <input type="radio"/> |
| <b>Q15_2</b> Something you anticipate needing later in your career? | <input type="radio"/> | <input type="radio"/> |
| <b>Q15_3</b> A personal goal?                                       | <input type="radio"/> | <input type="radio"/> |

----- Page Break -----

**Page 9 of 16 COVID-19 Employment Impact**

**Q16**

**Did your hospital's response to COVID-19 change the normal activities or scope of your job?**

- ☐ Yes, temporarily (1)
- ☐ Yes, permanently (2)
- ☐ No (0)

**(Q17)**

**Due to COVID-19, have you had to work ... (Select all that apply)**

- ☐ **Q17\_1** Longer hours
- ☐ **Q17\_2** Shorter hours
- ☐ **Q17\_3** More irregular hours (evenings, weekends, holidays)
- ☐ **Q17\_4** Other hours change, **Q17\_TEXT** please describe \_\_\_\_\_
- ☐ **Q17\_5** No hours change

ALL OF THE ABOVE CODED (1) IF SELECTED; (0) IF NOT SELECTED

**Q18**

**Due to COVID-19, were you at any time on mandatory furlough?**

- ☐ Yes, and still am (1)
- ☐ Yes, but no longer (2)
- ☐ No (0)

**Q19**

**Due to COVID-19, were you at any time on voluntary furlough?**

- ☐ Yes, and still am (1)
- ☐ Yes, but no longer (2)
- ☐ No (0)

**Q20**

**How worried are you that your job will be permanently terminated?**

- ☐ Extremely worried (1)
- ☐ Very worried (2)
- ☐ Somewhat worried (3)
- ☐ Slightly worried (4)
- ☐ Not worried at all (5)

----- Page Break -----

**Page 10 of 16**

**Q21**

**Due to COVID-19, were your benefits...**

- ☐ Increased (1)
- ☐ Unchanged (2)
- ☐ Reduced (3)

### Q22

Have you been given “combat pay” or augmented compensation for work with COVID patients?

- ☐ Yes (1)
- ☐ No (0)

### Q23

Due to COVID-19, was your base pay...

- ☐ Increased (1)
- ☐ Initially increased, and now back to normal (2)
- ☐ Unchanged (3)
- ☐ Initially reduced, and now back to normal (4)
- ☐ Reduced (5)
- ☐ Other (6), Q23\_TEXT please explain \_\_\_\_\_

### Q24 [DISPLAY IF FOR Q15 REDUCED OR INITIALLY REDUCED SELECTED]

COVID-19-related base pay reductions have been ...

- ☐ Voluntary (1)
- ☐ Involuntary (2)
- ☐ Both (3)

----- Page Break -----

Page 11 of 16

### Q25

How would you characterize your feelings of commitment to cPHM *before* COVID-19?

- ☐ Very high (1)
- ☐ Moderately high (2)
- ☐ Medium (3)
- ☐ Low (4)
- ☐ Very low (5)

### Q26

How would you characterize your feelings of commitment to cPHM *since* COVID-19?

- ☐ Very high (1)
- ☐ Moderately high (2)
- ☐ Medium (3)
- ☐ Low (4)
- ☐ Very low (5)

----- Page Break -----

Page 12 of 16

Demographic Information

### Q27

What is your current gender identity?

- ☐ Male (1)
- ☐ Female (2)
- ☐ Non-binary (3)
- ☐ Prefer other identity (4), Q27\_TEXT please describe \_\_\_\_\_

**Q28**

**What is your age?**

- ☐ 30 or younger (1)
- ☐ 31 - 40 (2)
- ☐ 41 – 50 (3)
- ☐ 51 – 60 (4)
- ☐ 61 or older (5)

----- Page Break -----

**Page 13 of 16**

**Q29**

**Where do you currently practice?**

- ☐ **Northeast:** Connecticut, Maine, Massachusetts, New Hampshire, Rhode Island, Vermont, New Jersey, New York, Pennsylvania (1)
- ☐ **Midwest:** Indiana, Illinois, Michigan, Ohio, Wisconsin, Iowa, Kansas, Minnesota, Missouri, Nebraska, North Dakota, South Dakota (2)
- ☐ **South:** Delaware, District of Columbia, Florida, Georgia, Maryland, North Carolina, South Carolina, Virginia, West Virginia, Alabama, Kentucky, Mississippi, Tennessee, Arkansas, Louisiana, Oklahoma, Texas (3)
- ☐ **West:** Arizona, Colorado, Idaho, New Mexico, Montana, Utah, Nevada, Wyoming, Alaska, California, Hawaii, Oregon, Washington (4)
- ☐ **Outside of the U.S.** (5)

**Q30**

**How would you describe your primary hospital setting?**

- ☐ Urban (1)
- ☐ Suburban (2)
- ☐ Rural (3)

**Q31**

**Is your hospital affiliated with a university-based center or free-standing children's hospital?**

- ☐ Yes (1)
- ☐ No (0)

**Q32**

**What is the estimated distance from the main hospital at which you work to the closest free-standing or university-based children's hospital?**

- ☐ Under 20 miles (1)
- ☐ 20 – 50 miles (2)
- ☐ 51-100 miles (3)
- ☐ Over 100 miles (4)

----- Page Break -----

**Page 14 of 16**

**Q33**

**How many years have you been employed in PHM**

- ☐ up to 5 (1)
- ☐ 6-10 (2)
- ☐ 11-20 (3)
- ☐ 21-30 (4)
- ☐ 31-40 (5)
- ☐ More than 40 (6)

**Q34**

**How many years have you been employed in community PHM (cPHM)**

- ☐ up to 5 (1)
- ☐ 6-10 (2)
- ☐ 11-20 (3)
- ☐ 21-30 (4)
- ☐ 31-40 (5)
- ☐ More than 40 (6)

**Q35**

**Do you hold a leadership role in your current job?**

- ☐ Yes (1), **Q35\_TEXT** please describe: \_\_\_\_\_
- ☐ No (0)

----- Page Break -----

**Page 15 of 16**

**Q36**

**Did you have any post-residency training?**

- ☐ Yes (1)
- ☐ No (0)

**(Q37) [SHOWN IF SELECTS YES FOR Q36]**

**What post-residency training? Select all that apply.**

- ☐ **Q37\_1** Chief Resident
- ☐ **Q37\_2** PHM fellowship
- ☐ **Q37\_3** Fellowship in a different sub-specialty
- ☐ **Q37\_4** Post-graduate degree, **Q37\_4\_TEXT** please list \_\_\_\_\_
- ☐ **Q37\_5** Certificate course work, **Q37\_5\_TEXT** please list \_\_\_\_\_
- ☐ **Q37\_6** Other, **Q37\_6\_TEXT** please list: \_\_\_\_\_

ALL OF THE ABOVE CODED (1) IF SELECTED; (0) IF NOT SELECTED

----- Page Break -----

**Page 16 of 16**

**Q38**

**Did you take and pass the PHM board certification in 2019?**

- ☐ Yes (1) [SURVEY ENDS]
- ☐ No (0)

**Q39 [SHOWN IF SELECTS NO FOR Q38]**

**Will you be eligible to take the PHM board certification exam by 2023?**

- ☐ Yes (1)
- ☐ No (0)

**Q40 [SHOWN IF SELECTS YES FOR Q39]**

**Do you plan to take the PHM board certification exam in either 2021 or 2023?**

- ☐ Definitely, yes (1)
- ☐ Probably, yes (2)
- ☐ Probably not (3)
- ☐ Definitely not (4)

**Q41 [SHOWN IF SELECTS NO FOR Q39]**

**Do you plan to pursue a PHM fellowship?**

- ☐ Definitely, yes (1)
- ☐ Probably, yes (2)
- ☐ Probably not (3)
- ☐ Definitely (4)

**Q42 [SHOWN IF SELECTS NO FOR Q39]**

**Do you plan to pursue a PHM board certification?**

- ☐ Definitely, yes (1)
- ☐ Probably, yes (2)
- ☐ Probably not (3)
- ☐ Definitely not (4)

**Thank you!**  
**We greatly appreciate your**  
**having taken the time to help.**

*Please hit the 'forward' button to submit your response.*
